# Supplementary material for: Killer whale presence drives bowhead whale selection for sea ice in Arctic seascapes of fear
Source: PubMed Central journal article supplement — Proc Natl Acad Sci U S A. 2020 Mar 9;117(12):6590–8. doi: 10.1073/pnas.1911761117 (PMC7104343; doi:10.1073/pnas.1911761117), 2020-03-09
Supplement: pnas.1911761117.sapp.pdf [file pnas.1911761117.sapp.pdf]

1 **Supplementary Materials 1**

2  
3 Table S1: Sex and estimated body length of the seven bowhead whales that were satellite tagged in Foxe  
4 Basin in July 2013 and whose telemetry data was analysed in this study. Sex was determined genetically  
5 while body size was coarsely estimated using the boat from which whales were tagged as a gauge. Tags  
6 were programmed to only transmit once per week after November 2013 and those data were not analyzed.

| Year | Region     | Sex | Length (m) | PTT    | Tag model | Date deployed | Duration |
|------|------------|-----|------------|--------|-----------|---------------|----------|
| 2013 | Foxe Basin | F   | 11-12      | 128145 | SPLASH10  | 2013-07-03    | 148 days |
| 2013 | Foxe Basin | F   | 13-14      | 128146 | SPLASH10  | 2013-07-03    | 148 days |
| 2013 | Foxe Basin | F   | 13         | 128148 | SPLASH10  | 2013-07-09    | 144 days |
| 2013 | Foxe Basin | F   | 10         | 128150 | SPLASH10  | 2013-07-09    | 143 days |
| 2013 | Foxe Basin | M   | 9-10       | 128151 | SPLASH10  | 2013-07-09    | 143 days |
| 2013 | Foxe Basin | M   | 9-10       | 128152 | SPLASH10  | 2013-07-09    | 143 days |
| 2013 | Foxe Basin | M   | 11-12      | 128154 | SPLASH10  | 2013-07-03    | 148 days |

7  
8 Table S2: Location and sex and age class data of the three satellite tagged killer whales whose telemetry  
9 data was analysed in this study. Sex/age class was determined visually from relative dorsal fin size and  
10 total body length.

| Year | Region         | Sex                            | PTT    | Tag model | Date deployed | Duration |
|------|----------------|--------------------------------|--------|-----------|---------------|----------|
| 2013 | Tremblay Sound | Adult male                     | 129471 | SPOT5     | 2013-08-12    | 29 days  |
| 2013 | Tremblay Sound | Adult male                     | 129469 | SPOT5     | 2013-08-12    | 58 days  |
| 2013 | Tremblay Sound | Adult female/<br>Immature male | 129470 | SPOT5     | 2013-08-12    | 18 days  |

11  
12 Table S3: Selection table for behavioral state of specific hypotheses addressing the effect of predation  
13 threat on SSM-inferred behavioral state. See Online Supplementary Material 2 for a complete model  
14 selection table across a much larger potential model set.

| Model                                                              | d.f. | AIC    | $\Delta$ AIC |
|--------------------------------------------------------------------|------|--------|--------------|
| $\text{logit}(B) \sim D_{kw} + D_{sh} + SI_{conc} + D_{sh}:D_{kw}$ | 8    | 5403.7 | 0            |
| $\text{logit}(B) \sim D_{kw} + D_{sh} + D_{sh}:D_{kw}$             | 7    | 5404.8 | 1.1          |
| $\text{logit}(B) \sim D_{sh} + SI_{conc}$                          | 6    | 5407.1 | 3.4          |
| $\text{logit}(B) \sim D_{kw} + D_{sh} + SI_{conc} + D_{sh}:D_{kw}$ | 5    | 5408.0 | 4.2          |
| $\text{logit}(B) \sim D_{kw} + D_{sh} + SI_{conc}$                 | 8    | 5411.1 | 7.4          |
| $\text{logit}(B) \sim D_{sh}$                                      | 5    | 5414.4 | 10.7         |
| $\text{logit}(B) \sim \text{intercept only (null)}$                | 4    | 5416.7 | 13.0         |
| $\text{logit}(B) \sim \text{Depth}$                                | 5    | 5417.3 | 13.6         |
| $\text{logit}(B) \sim i_{s_{ice}}$                                 | 5    | 5417.4 | 13.8         |
| $\text{logit}(B) \sim D_{edge}$                                    | 5    | 5417.9 | 14.2         |
| $\text{logit}(B) \sim D_{kw}$                                      | 7    | 5418.4 | 14.7         |

17 Table S4: Fitted parameters for best-fitting model (see Table S3) predicting movement behavior as a  
 18 function of environmental covariates and predation threat. The fitted parameters shown were used to  
 19 project predicted behavioral state onto space in Fig. 3 of the main text.

| Variable                             | Coef   | SE    | z      | P      |
|--------------------------------------|--------|-------|--------|--------|
| <i>Intercept</i>                     | -1.295 | 1.154 | 1.121  | 0.262  |
| <i>D<sub>kw</sub></i>                | -0.294 | 0.174 | -1.683 | 0.092  |
| <i>D<sub>sh</sub></i>                | -0.515 | 0.229 | -2.249 | 0.025  |
| <i>SI<sub>conc</sub></i>             | -0.027 | 0.015 | -1.782 | 0.075  |
| <i>D<sub>kw</sub>:D<sub>sh</sub></i> | 0.098  | 0.035 | 2.725  | 0.0065 |
| $\Phi$ (autocorrelation)             | 0.927  | -     | -      | -      |

20  
 21 Multimedia Supplement 1. Dynamic movie of state-space model fitted tracks of killer whales  
 22 and bowhead whales showing predator-prey interactions and their interactions with sea ice.  
 23 The three killer whales are indicated by black circles, and color of bowhead tracks represents  
 24 SSM fitted behavioral states. Red is inferred resident behavior, while blue is inferred transit  
 25 behavior. Lower intensity colors indicate less certain behavioral states, with white being  
 26 completely uncertain.

27
